# Supplementary material for: Neodymium Recovery from the Aqueous Phase Using a Residual Material from Saccharified Banana-Rachis/Polyethylene-Glycol
Source: MDPI journal article supplement (doi:10.3390/polym15071666), 2023-03-27
Supplement: s1 [file s1]

## Supplementary Materials:

Figure S1: Recovery in a mixture Nd/Fe performed by BR-PEG

Figure S2: Chemical distribution diagram to the Nd/Fe mixture used in the selectivity experiments. (a) Nd ions, (b) Fe ions

Figure S3: FTIR analysis after one cycle of adsorption-desorption

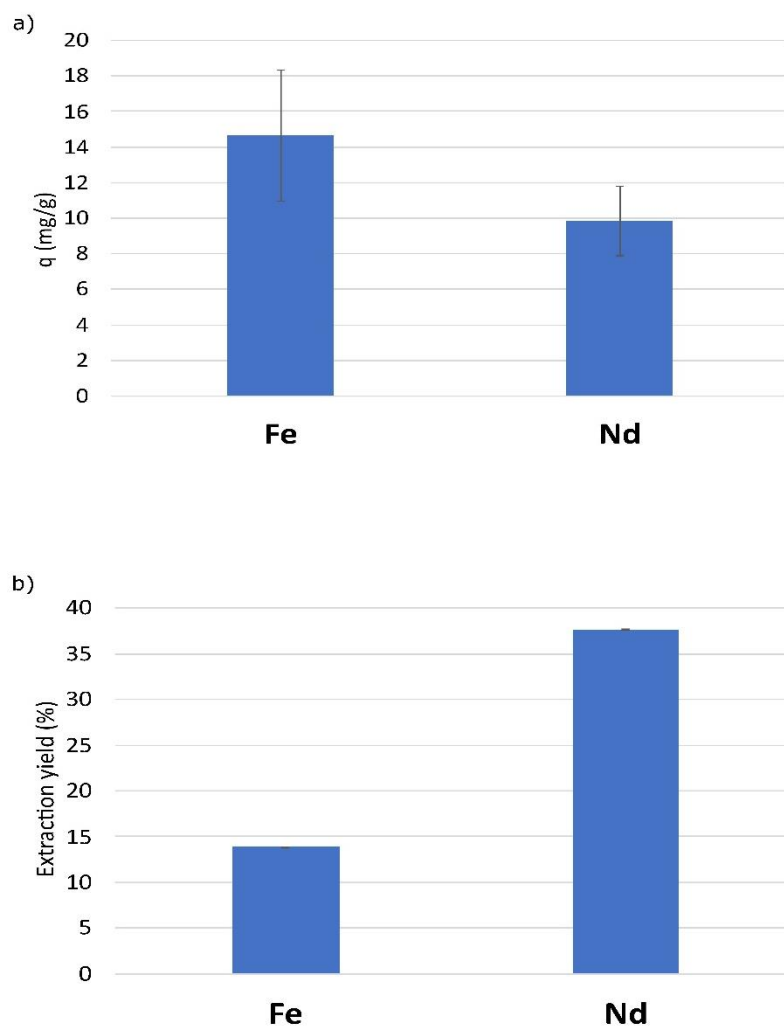

**Figure S1.** Recovery in a mixture Nd/Fe performed by BR-PEG

(Experimental conditions: initial concentrations: Fe: 6.69 mmol/L, Nd: 1.10 mmol/L; pH<sub>0</sub>: 4.5; buffer acetate concentration: 0.5 M acetic acid and 0.01 M sodium acetate; temperature: 25 °C; sorbent dosage, SD: 1 g/L; agitation speed: 180 rpm)

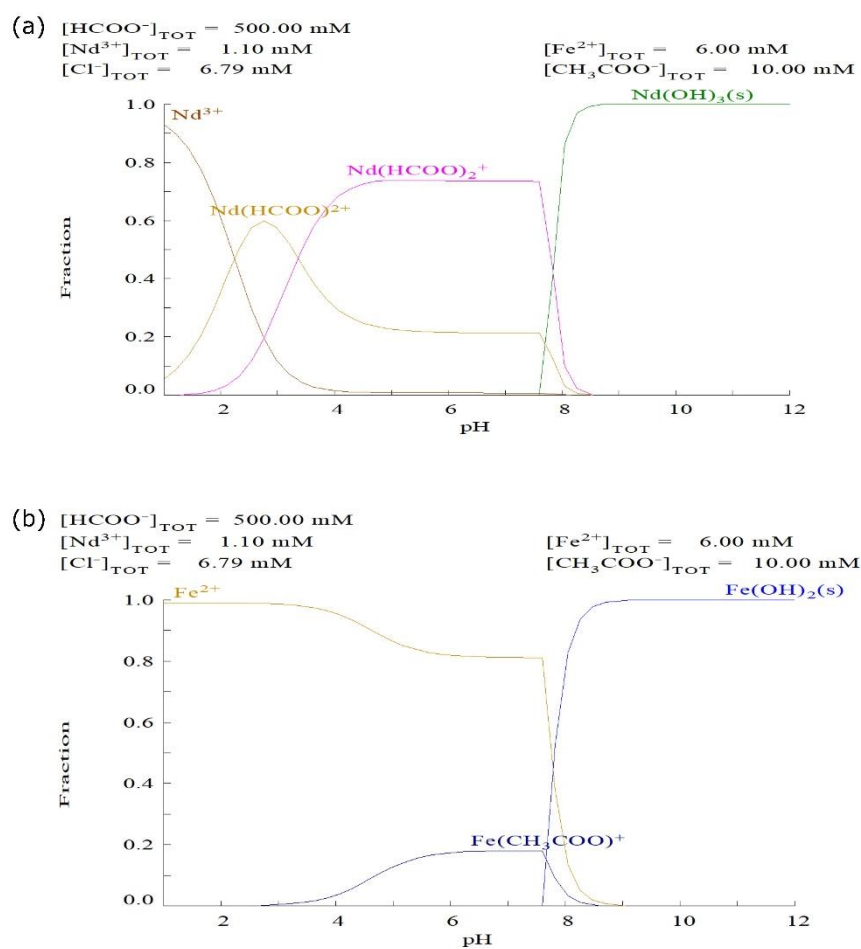

**Figure S2.** Chemical distribution diagram to the Nd/Fe mixture used in the selectivity experiments. (a) Nd ions, (b) Fe ions

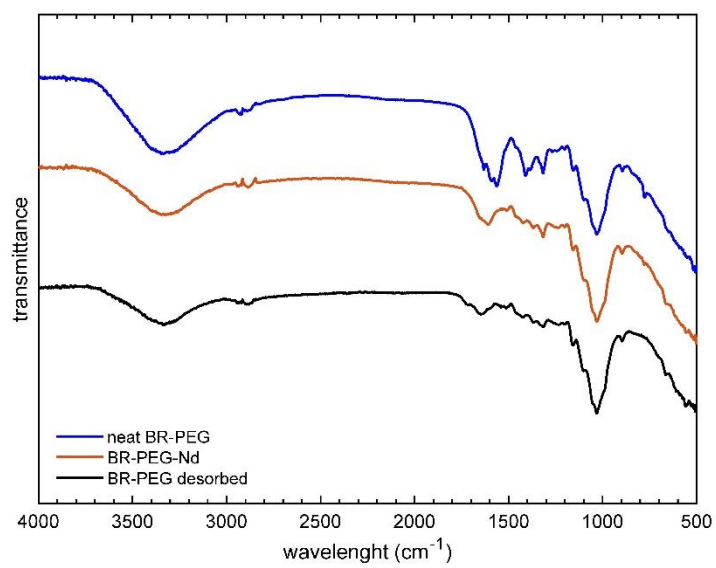

**Figure S3.** FTIR analysis after one cycle of adsorption-desorption
